# Supplementary material for: CXCL9/10/11, a regulator of PD-L1 expression in gastric cancer
Source: BMC Cancer. 2018 Apr 24;18:462. doi: 10.1186/s12885-018-4384-8 (PMC5916585; doi:10.1186/s12885-018-4384-8)
Supplement: Supplementary file 4 — Table S4. 81 genes that had a close relationship to PD-L1 were selected for Gene functional classification after spearman correlation analysis. (XLS 25 kb) [file 12885_2018_4384_MOESM4_ESM.xls]

## Sheet: OP_cd274Correlated
Table S4: 81 genes that had a close relationship to PD-L1 were selected for Gene functional classification after spearman correlation analysis.
Gene	pval	rval
CD274	0	1
GBP1	0	0.781301
GBP5	0	0.776228
WARS	0	0.732327
IDO1	0	0.728384
CCL4	0	0.726262
GBP4	0	0.725278
IFNG	3.65831e-62	0.724144
PDCD1LG2	0	0.719906
CD80	0	0.714908
IL2RA	0	0.700154
CXCL10	0	0.6914
LCP2	0	0.687297
IL2RB	0	0.685232
GZMB	0	0.684468
PRF1	0	0.681904
ICOS	0	0.6815
CXCL9	0	0.67524
STAT1	0	0.673952
LAP3	0	0.672797
SLAMF8	0	0.669769
HAVCR2	0	0.666465
PLEK	0	0.663329
CLEC7A	0	0.661543
TLR8	0	0.661032
GZMA	0	0.66078
ICAM1	0	0.660426
LAG3	0	0.654614
CLEC4A	0	0.652434
FASLG	0	0.651097
IL18RAP	0	0.650906
APOL6	0	0.650347
IRF1	0	0.650185
CTLA4	0	0.648166
CD86	0	0.644873
FCGR3A	0	0.641487
CXCR6	0	0.640858
TNIP3	0	0.640803
CLEC12A	0	0.639024
MMP25	0	0.638466
TNFSF13B	0	0.634962
STX11	0	0.634857
NCF2	0	0.634341
CCL3	0	0.633581
SLA2	0	0.633221
CD300LF	0	0.632766
SAMSN1	0	0.631888
GNLY	0	0.6313
CYBB	0	0.630513
CXCL11	0	0.629687
ADAMDEC1	0	0.628842
ITGAE	0	0.625433
HK3	0	0.624658
SAMD9L	0	0.624371
CD53	0	0.624259
CD96	0	0.624126
CRTAM	0	0.622429
LILRB4	0	0.621204
TNFRSF9	0	0.620237
CD226	0	0.618778
LILRB2	0	0.617564
BTN3A1	0	0.61708
SLAMF7	0	0.616419
CCR5	0	0.616289
IL21R	0	0.615693
TIGIT	0	0.614953
ZBED2	0	0.613629
SIGLEC10	0	0.613438
KLRD1	0	0.613128
CD2	0	0.612717
PTPRC	0	0.611587
CCR1	0	0.610484
NLRC5	0	0.61046
IL12RB1	0	0.609374
LCP1	0	0.608971
KLRC4	3.48966e-39	0.607409
LAPTM5	0	0.60488
HCK	0	0.604856
FPR3	0	0.604783
AIM2	0	0.602758
BCL2A1	0	0.601256
CD300A	0	0.601002
